# Supplementary material
Source: MDPI journal article supplement (https://www.mdpi.com/2071-1050/13/9/4619)
Supplement: s1 [file s1]

Comparison of MoOSTs tasks based on their traditional and fuzzy criticality numbers

| No. | Breakdown of MoOSTs Tasks                                                       | F | C  | Cav no | Fuzzy no | Cav level | Labour discipline            |
|-----|---------------------------------------------------------------------------------|---|----|--------|----------|-----------|------------------------------|
| 1   | Amendment of leakage at the burner pipe due to fine coal pressuring at air pipe | 3 | 8  | 24     | 35.9     | C         | Mechanical fitter and welder |
| 2   | Anchoring of burner pipe exposed portion                                        | 4 | 8  | 32     | 48.1     | C         | Mechanical fitter and welder |
| 3   | Assembling of crusher rotor onto new shaft                                      | 4 | 8  | 32     | 48.1     | C         | Mechanical fitter and welder |
| 4   | Back filter bottom screw No.1 - 10 drive chains cleaning                        | 4 | 7  | 28     | 48.1     | C         | Mechanical fitter            |
| 5   | Capping of cracked shell portion (Inside of the kiln)                           | 4 | 14 | 56     | 75.4     | EC        | Mechanical fitter            |
| 6   | Capping of cracked shell portion (outside of the kiln)                          | 4 | 14 | 56     | 75.4     | EC        | Mechanical fitter            |
| 7   | Casting of stage 4 riser duct area                                              | 4 | 14 | 56     | 75.4     | EC        | Mechanical casting           |
| 8   | Connections of main drive motor left and right hand side rotor cables           | 4 | 8  | 32     | 48.1     | C         | Automation and electrical    |
| 9   | Connections of main drive cooling fan motor power cable                         | 4 | 8  | 32     | 48.1     | C         | Automation and electrical    |
| 10  | Connections of main drive motor 3.3KV power cables                              | 4 | 8  | 32     | 48.1     | C         | Automation and electrical    |
| 11  | Connections of main drive motor control cables                                  | 4 | 8  | 32     | 48.1     | C         | Automation and electrical    |
| 12  | Connections of main drive tachometer cables                                     | 4 | 8  | 32     | 48.1     | C         | Automation and electrical    |
| 13  | Cut off lining plate out of inspection door @ stage 4                           | 4 | 10 | 40     | 48.3     | C         | Mechanical fitter            |
| 14  | Cutting of new holes (6off) for the blaster stainless steel pipes               | 4 | 8  | 32     | 48.1     | C         | Mechanical welder            |
| 15  | Cutting of platforms channels, plate & hand rails pipes @ DA17 Dampers areas    | 4 | 14 | 56     | 75.4     | EC        | Fabricator and welder        |
| 16  | Cutting of stainless steel pipe (6")                                            | 4 | 8  | 32     | 48.1     | C         | Mechanical fitter            |
| 17  | Dismantling of burner pipe oil gun jacket tube                                  | 4 | 8  | 32     | 48.1     | C         | Mechanical fitter            |
| 18  | Dismantling of canter-lever scaffold at preheater stage 4                       | 4 | 8  | 32     | 48.1     | C         | Scaffolding                  |
| 19  | Dismantling of scaffold @ Gepol fan inlet & outlet duct expansion joint area    | 4 | 8  | 32     | 48.1     | C         | Scaffolding                  |
| 20  | Dismantling of scaffold @ LIW hopper internal                                   | 4 | 8  | 32     | 48.1     | C         | Scaffolding                  |
| 21  | Dismantling of scaffold @ LIW plug valve area                                   | 4 | 8  | 32     | 48.1     | C         | Scaffolding                  |
| 22  | Dismantling of scaffolding at backend up-riser area                             | 4 | 8  | 32     | 48.1     | C         | Scaffolding                  |
| 23  | Dismantling of the backend blaster ((8off)                                      | 4 | 8  | 32     | 48.1     | C         | Mechanical fitter            |
| 24  | Erect scaffolding @ Niro inlet & outlet duct inspection door areas              | 2 | 14 | 28     | 41.5     | C         | Scaffolding                  |
| 25  | Extraction gate power cylinder servicing 4off                                   | 4 | 8  | 32     | 48.1     | C         | Electrical                   |
| 26  | Extraction gate power cylinder removed to workshop 4off                         | 4 | 8  | 32     | 48.1     | C         | Electrical                   |
| 27  | Filling & hard-facing of clinker crusher hammers (old ones)                     | 3 | 10 | 30     | 48.1     | C         | Mechanical welder            |
| 28  | Fix and tighten main drive DE top/bottom covers                                 | 4 | 8  | 32     | 48.1     | C         | Mechanical technician        |
| 29  | Fix and tighten main drive NDE top/bottom covers                                | 4 | 8  | 32     | 48.1     | C         | Mechanical technician        |
| 30  | Fix back roofing support frame vertical and horizontal                          | 4 | 8  | 32     | 48.1     | C         | Mechanical                   |
| 31  | Form-work                                                                       | 4 | 8  | 32     | 48.1     | C         | Mechanical                   |
| 32  | Free and service all cyclone flaps.                                             | 4 | 8  | 32     | 48.1     | C         | Mechanical fitter            |
| 33  | General house and conveying of all scrap metals/pipes                           | 4 | 7  | 28     | 48.1     | C         | Fabricator and welder        |
| 34  | Gepol fan lubrication flow switch serving and test                              | 4 | 8  | 32     | 48.1     | C         | Automation and electrical    |
| 35  | Gepol fan motor cooling unit servicing                                          | 4 | 8  | 32     | 48.1     | C         | Automation and electrical    |

**Table IX (Continued)**

| Nos. | Breakdown of MoOSTs activities                                                          | F | C  | Cav no | Fuzzy no | Cav level | Labour discipline            |
|------|-----------------------------------------------------------------------------------------|---|----|--------|----------|-----------|------------------------------|
| 36   | Inspection of Niro screw journals & hanger bearings                                     | 4 | 8  | 32     | 48.1     | C         | Mechanical inspection        |
| 37   | Inspection of preheater cyclone top                                                     | 4 | 8  | 32     | 48.1     | C         | Mechanical inspection        |
| 38   | Inspection of preheater stage 4 wall bricks                                             | 4 | 8  | 32     | 48.1     | C         | Production/Operations        |
| 39   | Inspection of stage 1, 2,3 & 4 Wall linings / hanging material                          | 4 | 8  | 32     | 48.3     | C         | Production/Operations        |
| 40   | Install air-lensing holes at preheater cyclone flap areas                               | 4 | 8  | 32     | 48.1     | C         | Mechanical fitter            |
| 41   | Backend Gas Analyser                                                                    | 2 | 12 | 24     | 30       | C         | Instrumentation              |
| 42   | Bolts and align main drive motor with coupling                                          | 4 | 8  | 32     | 48.3     | C         | Automation and electrical    |
| 43   | Bottom screws top & bottom covers seal ropes to be replaced                             | 4 | 8  | 32     | 48.3     | C         | Mechanical fitter            |
| 44   | Casting of backend inlet segment plate                                                  | 4 | 10 | 40     | 48.3     | C         | Mechanical casting           |
| 43   | Casting of backend inlet trays (4 off)                                                  | 4 | 10 | 40     | 48.3     | C         | Mechanical casting           |
| 46   | Cleaning of the girth gear teeth                                                        | 4 | 9  | 36     | 48.3     | C         | Mechanical fitter            |
| 47   | Clinker crusher internal & external inspection / wear rate measurement                  | 3 | 10 | 30     | 48.3     | C         | Mechanical inspection        |
| 48   | Clinker crusher old hammers to be removed                                               | 4 | 10 | 40     | 48.3     | C         | Mechanical fitter and welder |
| 49   | Clinker crusher top cover to be boxed up                                                | 3 | 10 | 30     | 48.3     | C         | Mechanical fitter            |
| 50   | Convey and Fix L.I.W LHS & RHS plug valve compartment unit                              | 4 | 8  | 32     | 48.1     | C         | Electrical                   |
| 51   | Convey and fix to position L.I.W LHS & RHS plug valve compartment                       | 4 | 8  | 32     | 48.1     | C         | Electrical                   |
| 52   | Cooler 1 replacement of 10 bad mild steel lifters, 10 cast lifters & 2 slotted          | 4 | 8  | 32     | 48.1     | C         | Mechanical fitter and welder |
| 53   | Cooler 1 replacement of 3 cast lifters                                                  | 3 | 8  | 24     | 35.9     | C         | Mechanical fitter and welder |
| 54   | Cooler 1 replacement of 6 worn cone breakers, 10 cast lifters & 9 slotted               | 3 | 8  | 24     | 35.9     | C         | Mechanical fitter and welder |
| 55   | Cooler 2 replacement of 5 straight edge mild steel lifters, 10 cast lifters &           | 3 | 8  | 24     | 35.9     | C         | Mechanical fitter and welder |
| 56   | Cooler 2 replacement of 6 slotted hub lifters                                           | 4 | 8  | 32     | 35.9     | C         | Mechanical fitter and welder |
| 57   | Couple back / alignment of kiln main drive motor coupling                               | 4 | 8  | 32     | 48.3     | C         | Mechanical                   |
| 58   | Couple back kiln girth gear pinion coupling                                             | 4 | 8  | 32     | 48.3     | C         | Mechanical fitter            |
| 59   | Crusher rotor back to site / assembled                                                  | 4 | 8  | 32     | 48.3     | C         | Mechanical fitter and welder |
| 60   | Cyclone 1 - 4 thermocouple probe servicing in the workshop                              | 4 | 8  | 32     | 48.3     | C         | Instrumentation              |
| 61   | Cyclone 1 -4 thermocouple probe to disconnect and remove to workshop                    | 4 | 8  | 32     | 48.3     | C         | Instrumentation              |
| 62   | Cyclone 1- 4 thermocouple probe to fix and connect back                                 | 4 | 8  | 32     | 48.3     | C         | Electrical                   |
| 63   | Cyclone 4 bottom flange leakage                                                         | 4 | 8  | 32     | 48.3     | C         | Mechanical fitter            |
| 64   | Cyclone 4 gas outlet expansion joint loose bolt.                                        | 4 | 8  | 32     | 48.3     | C         | Mechanical fitter            |
| 65   | Erect scaffold / installation of tarpaulin @ station 1 - 3 for cracks welding work      | 4 | 8  | 32     | 48.1     | C         | Scaffolding                  |
| 66   | Erect scaffold / installation of tarpaulin @ station 2 for kiln shell cracks welding wo | 3 | 10 | 30     | 48.3     | C         | Scaffolding                  |
| 67   | Erect scaffold @ backend power cylinder area                                            | 3 | 10 | 30     | 48.3     | C         | Scaffolding                  |
| 68   | Erect scaffold @ Gepol fan inlet & outlet duct expansion joint area                     | 3 | 10 | 30     | 48.3     | C         | Scaffolding                  |
| 69   | Erect scaffold Gepol fan damper bearings area                                           | 4 | 8  | 32     | 48.3     | C         | Scaffolding                  |
| 70   | Erect scaffold @ girth gear area                                                        | 4 | 8  | 32     | 48.3     | C         | Scaffolding                  |

**Table IX (Continued)**

| Nos. | Breakdown of MoOSTs activities                                                 | F | C  | Cav | Fuzzy no | Cav level | Labour discipline            |
|------|--------------------------------------------------------------------------------|---|----|-----|----------|-----------|------------------------------|
| 71   | Erect scaffold Gepol fan damper power cylinder area                            | 4 | 8  | 32  | 48.3     | C         | Scaffolding                  |
| 72   | Erection of mini scaffold for removal of damper power cylinder                 | 3 | 10 | 30  | 48.3     | C         | Scaffolding                  |
| 73   | Erection of scaffold (canter-lever) at preheater state 4 internal              | 3 | 10 | 30  | 48.3     | C         | Scaffolding                  |
| 74   | Erection of scaffold / blanking at kiln backend internal                       | 4 | 8  | 32  | 48.1     | C         | Scaffolding                  |
| 75   | Filling / Machining of clinker crusher rotor shaft bearing seat                | 4 | 14 | 56  | 75.4     | EC        | Mechanical fitter and welder |
| 76   | Fix back clinker crusher drive belt & guard                                    | 4 | 8  | 32  | 48.3     | C         | Mechanical fitter            |
| 77   | Girth gear heat shield bolts retightening / replacement of heat shields        | 4 | 14 | 56  | 75.4     | EC        | Mechanical                   |
| 78   | Goudging of cracked shell at station 2                                         | 2 | 12 | 24  | 30       | C         | Expert goulder               |
| 79   | Goudging of cracked shell from inside of the kiln                              | 2 | 12 | 24  | 30       | C         | Expert goulder               |
| 80   | Gouging / grinding of station 1- 3 cracked tyre pads                           | 4 | 8  | 32  | 48.1     | C         | Mechanical steel work        |
| 81   | Greasing of girth gear pinion coupling                                         | 4 | 8  | 32  | 48.1     | C         | Method lubrication           |
| 82   | Greasing of station 1& 2 thruster block                                        | 4 | 8  | 32  | 48.1     | C         | Method lubrication           |
| 83   | Grinding of the girth gear mushroomed teeth                                    | 2 | 12 | 24  | 30       | C         | Mechanical fitter            |
| 84   | Hard-facing of clinker crusher rotor and casing liners / patching of punctured | 3 | 10 | 30  | 48.3     | C         | Mechanical fitter and welder |
| 85   | Hydraulic unit lube tank oil to be drain and tank to be clean                  | 4 | 8  | 32  | 48.1     | C         | Mechanical fitter            |
| 86   | Inspect & record clearance of bag filter fan bearings (DE & NDE)               | 4 | 8  | 32  | 48.3     | C         | Mechanical inspection        |
| 87   | Inspect Gepol fan outlet duct expansion joint canvas (need scaffolding).       | 4 | 8  | 32  | 48.3     | C         | Mechanical fitter            |
| 88   | Inspection / cleaning of air chamber                                           | 4 | 8  | 32  | 48.3     | C         | Mechanical fitter            |
| 89   | Inspection / replacement of damage diaphragms                                  | 4 | 8  | 32  | 48.3     | C         | Mechanical fitter            |
| 90   | Inspection / validation of preheater stage 4 canter-lever scaffold             | 4 | 8  | 32  | 48.3     | C         | Pyro-processing              |
| 91   | Inspection / validation of scaffold                                            | 4 | 8  | 32  | 48.3     | C         | Safety inspection            |
| 92   | Inspection / validation of scaffold @ fan damper power cylinder area           | 4 | 8  | 32  | 48.3     | C         | Safety inspection            |
| 93   | Inspection / validation of scaffold @ girth gear area                          | 4 | 8  | 32  | 48.3     | C         | Safety inspection            |
| 94   | Inspection / validation of scaffold @ LIW plug valve area                      | 4 | 8  | 32  | 48.3     | C         | Safety inspection            |
| 95   | Inspection / validation of scaffold @ LIW screw area                           | 4 | 8  | 32  | 48.3     | C         | Safety inspection            |
| 96   | Inspection / validation of scaffold @ Niro chamber Internal                    | 4 | 8  | 32  | 48.3     | C         | Safety inspection            |
| 97   | Inspection / validation of scaffold @ Niro inlet & outlet duct inspection door | 4 | 8  | 32  | 48.3     | C         | Safety inspection            |
| 98   | Inspection / validation of scaffold + platform                                 | 4 | 8  | 32  | 48.3     | C         | Safety inspection            |
| 99   | Inspection / validation of scaffold at station 1 & 2                           | 4 | 8  | 32  | 48.3     | C         | Safety inspection            |
| 100  | Inspection / validation of backend scaffold & blank                            | 4 | 8  | 32  | 48.3     | C         | Safety inspection            |
| 101  | Inspection of bag filter fan base vibration isolator                           | 4 | 8  | 32  | 48.3     | C         | Mechanical inspection        |
| 102  | Installation of backend floating rings segments (12off)                        | 4 | 10 | 40  | 48.3     | C         | Mechanical fitter and welder |
| 103  | Kiln Turn with No.1 - 9 cooler @ TDC                                           | 4 | 14 | 56  | 75.4     | EC        | Production/Operations        |
| 104  | Re-build platform No.1 - 9 elbow area                                          | 3 | 8  | 24  | 35.9     | C         | Scaffolding                  |
| 105  | Ultra-Sonic crack detection test of station 1 - 4 right roller shafts          | 3 | 10 | 30  | 48.3     | C         | Ultra sonic crack detection  |
